# Supplementary material for: Immunotoxicity and Transcriptome Analyses of Zebrafish (Danio rerio) Embryos Exposed to 6:2 FTSA
Source: MDPI journal article supplement (doi:10.3390/toxics11050459), 2023-05-15
Supplement: s1 [file s1]

# Immunotoxicity and Transcriptome Analyses of Zebrafish (*Danio rerio*) Embryos Exposed to 6:2 FTSA

Jing Zhang, Zongming Ren \* and Meng Chen \*

Institute of Environment and Ecology, Shandong Normal University, Jinan 250358, China;  
15506686558@163.com

\* Correspondence: zmren@sdu.edu.cn (Z.R.); chenmeng.1989@163.com (M.C.)

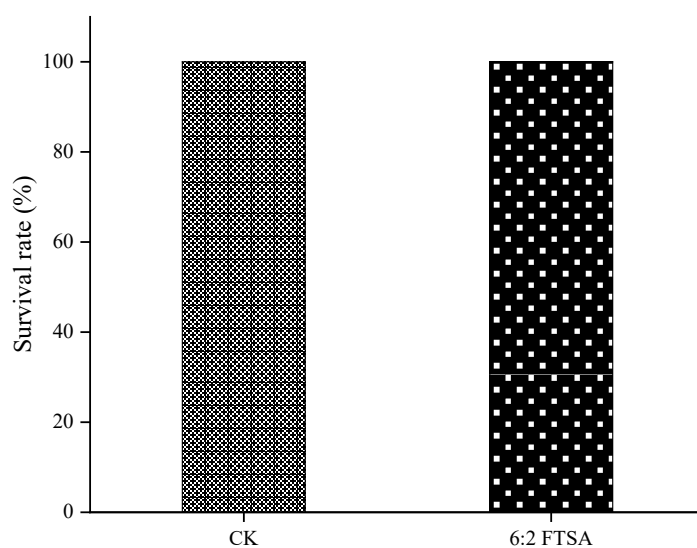

**Figure S1.** Survival rate of zebrafish larvae under different treatment groups. Data expressed as the mean  $\pm$  standard deviation. CK=control group.

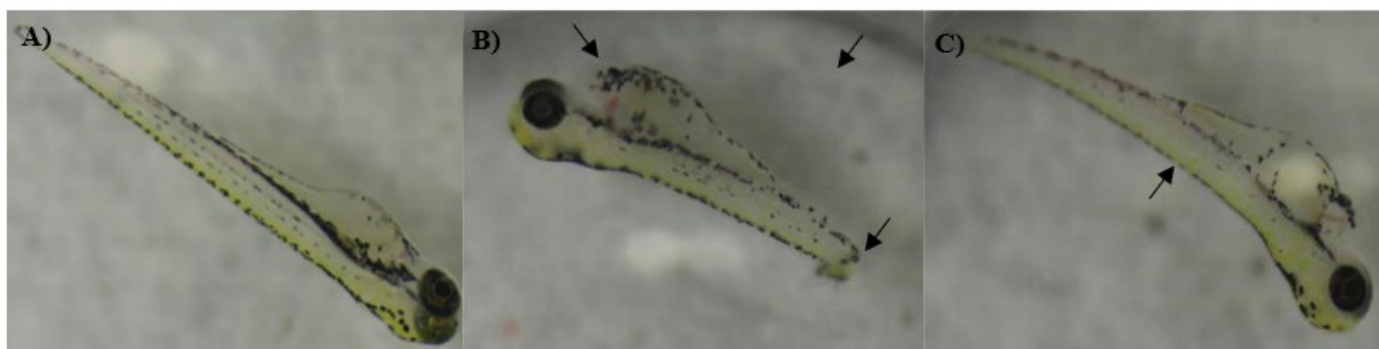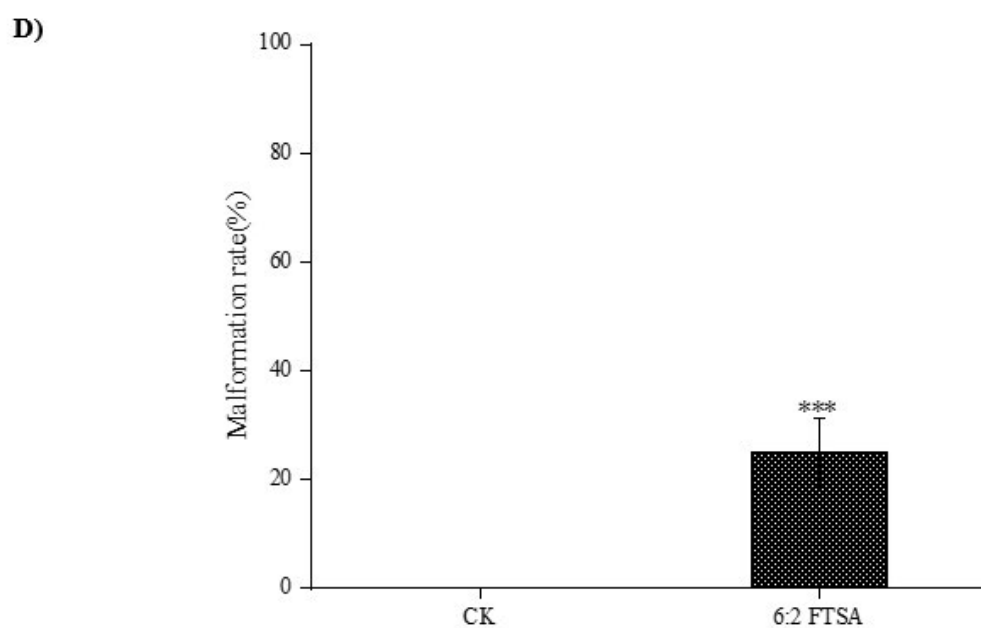

**Figure S2.** Deformities of zebrafish larvae in different treatment groups (A): normal; B): pericardial edema, yolk sac edema, tail curvature; C): scoliosis; D): Malformation rate). Data expressed as the mean  $\pm$  standard deviation. Asterisks indicate significant differences between the exposure and control groups: \*\*\* $p < 0.001$ . CK = control group.
